# Supplementary material for: A hierarchical Ca/TiO2/NH2-MIL-125 nanocomposite photocatalyst for solar visible light induced photodegradation of organic dye pollutants in water
Source: Royal Society of Chemistry journal article supplement (doi:10.1039/d0ra05192f), 2020-01-01
Supplement: d0ra05192f1.pdf [file d0ra05192f1.pdf]

**Table SM 1.** First-order kinetic model parameters for photodegradation of MO and RhB at different concentrations

| MO concentration<br>(mg/L) | Reaction rate (k)<br>(min <sup>-1</sup> ) | Correlation coefficient<br>(R <sup>2</sup> ) | Fitting equation |
|----------------------------|-------------------------------------------|----------------------------------------------|------------------|
| 1                          | 0.0142                                    | 0.9977                                       | Y=0.0142x+2.0699 |
| 5                          | 0.0136                                    | 0.9914                                       | Y=0.0136x+1.7015 |
| 10                         | 0.0127                                    | 0.9822                                       | Y=0.0127x+1.3732 |
| 20                         | 0.0103                                    | 0.9822                                       | Y=0.0103x+1.1328 |
| 30                         | 0.0079                                    | 0.9814                                       | Y=0.0079x+0.9359 |
| 40                         | 0.0076                                    | 0.9805                                       | Y=0.0076x+0.6818 |

  

| RhB concentration<br>(mg/L) | Reaction rate (k)<br>(min <sup>-1</sup> ) | Correlation coefficient<br>(R <sup>2</sup> ) | Fitting equation |
|-----------------------------|-------------------------------------------|----------------------------------------------|------------------|
| 1                           | 0.0152                                    | 0.993                                        | Y=0.0152x+1.7983 |
| 5                           | 0.0132                                    | 0.993                                        | Y=0.0132x+1.6332 |
| 10                          | 0.0131                                    | 0.9858                                       | Y=0.0131x+1.4304 |
| 20                          | 0.01                                      | 0.9825                                       | Y=0.01x+1.2601   |
| 30                          | 0.0099                                    | 0.9891                                       | Y=0.0099x+0.9577 |
| 40                          | 0.0093                                    | 0.9821                                       | Y=0.0093x+0.79   |

**Table SM 2.** Zeta potentials of the aged Ca(30%)/TiO<sub>2</sub>/NH<sub>2</sub>-MIL-125 photocatalyst versus aging times

| Aging time (month) | Zeta potential |
|--------------------|----------------|
| 0                  | 4.6            |
| 1                  | 7.21           |
| 2                  | 11.35          |
| 4                  | 16.75          |
| 6                  | 20.42          |
| 9                  | 24.63          |
| 12                 | 30.06          |
